# Supplementary material
Source: PubMed Central journal article supplement (PMC9482380)
Supplement: NIHMS1836167-supplement-Supplementary_material.pdf [file NIHMS1836167-supplement-Supplementary_material.pdf]

Supporting information:

## **Renally excretable silver telluride nanoparticles as contrast agents for x-ray imaging**

Lenitza M. Nieves<sup>1,2</sup>, Yuxi Dong<sup>1,3</sup>, Derick N. Rosario-Berríos<sup>1,2</sup>, Katherine Mossburg<sup>1,3</sup>, Jessica C. Hsu<sup>1,3</sup>, Gwendolyn M. Cramer<sup>4</sup>, Theresa M. Busch<sup>4</sup>, Andrew D. A. Maidment<sup>1</sup>, and David P. Cormode<sup>1,3,5\*</sup>.

<sup>1</sup>Department of Radiology, University of Pennsylvania, Philadelphia, PA, USA

<sup>2</sup>Biochemistry and Molecular Biophysics Graduate Group, University of Pennsylvania, Philadelphia, PA, USA

<sup>3</sup>Department of Bioengineering, University of Pennsylvania, Philadelphia, PA, USA

<sup>4</sup>Department of Radiation Oncology, University of Pennsylvania, Philadelphia, PA, USA

<sup>5</sup>Department of Cardiology, University of Pennsylvania, Philadelphia, PA, USA

\* Corresponding author

E-mail: david.cormode@pennmedicine.upenn.edu

#### **4 nm GSH-coated silver telluride nanoparticle synthesis:**

The 4 nm core, GSH-coated Ag<sub>2</sub>Te NPs were synthesized by preparing an aqueous solution as described above, followed by the addition of 1 mL of N<sub>2</sub>H<sub>4</sub>. The reaction was allowed to proceed for 15 minutes at room temperature under constant magnetic stirring. The synthesis was then quenched by placing the flask on an ice bath. The NPs were then washed, and suspended in PBS, as described above. The NPs were stored at 4 °C until further use.

#### **Thermogravimetric analysis:**

The thermal gravimetric analysis was conducted using a SDT Q600 TGA equipment (TA Instruments, New Castle, DE). Nitrogen gas was used to purge the instrument at a flow rate of 100 mL/min. The samples were heated up to 500 °C at a rate of 20 °C/min.

#### **MTS assay:**

MTS ((3-(4,5-dimethylthiazol-2-yl)-5-(3-carboxymethoxyphenyl)-2-(4-sulfophenyl)-2H-tetrazolium)) assay (Promega, Madison, WI) was used to further evaluate the cytotoxicity of GSH-Ag<sub>2</sub>Te NPs according to the manufacturer's recommended protocol. In brief, the assay was performed in 96-well flat bottom plates with 20,000 cells per well seeded 24 hours before the experiment. The cells were incubated for 4 hours with GSH-Ag<sub>2</sub>Te NPs at concentrations of 0, 0.1, 0.25, 0.5, or 1 mg of Ag per mL. After 4 hours of incubation, the treatment was removed and 20 µL of the MTS reagent and 100 µL of fresh media were added to each well and incubated for 30 minutes. A plate reader was then used to measure the absorbance at 490 nm. Three independent experiments were performed for each condition. The data is presented as mean cell viability relative to control ± standard deviation (n = 3).

Table S1: Reactions for the synthesis of sub 5 nm Ag<sub>2</sub>Te nanoparticles.

| Coating        | Reaction time | Temp. | Core size (nm) |
|----------------|---------------|-------|----------------|
| GSH<br>30mM    | 10 min        | RT    | 4 ± 1          |
|                | 12 min        | RT    | 3.6 ± 0.9      |
|                | 13 min        | RT    | 4 ± 1          |
|                | 15 min        | RT    | 4 ± 1          |
|                | Overnight     | RT    | 5 ± 1          |
|                | 5 min         | Ice   | 3 ± 1          |
|                | 10 min        | Ice   | 4 ± 1          |
| GSH<br>60 mM   | 15 min        | RT    | 2 ± 1          |
| 3-MPA<br>30 mM | 10 min        | RT    | 3 ± 2          |
|                | 12 min        | RT    | 5.5 ± 0.7      |
|                | 13 min        | RT    | 4 ± 1          |
|                | 15 min        | RT    | 7 ± 2          |
|                | 15 min        | Ice   | 2.1 ± 0.7      |
|                | 10 min        | Ice   | 4 ± 1          |
|                | 5 min         | Ice   | 3 ± 1          |
| 3-MPA<br>90 mM | 15 min        | RT    | 2 ± 1          |
|                | 15 min        | Ice   | 1.8 ± 0.7      |
|                | 10 min        | Ice   | 8 ± 1          |

RT = room temperature; Ice = ice bath.

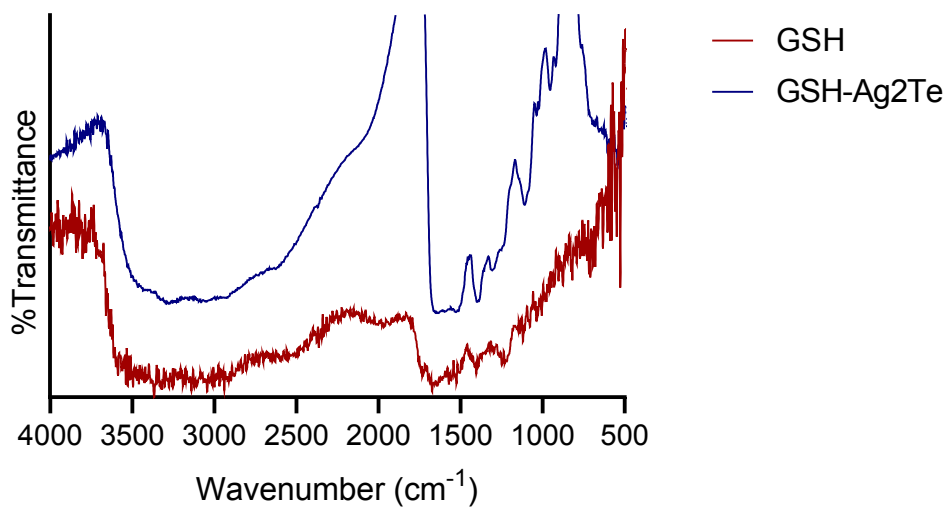

Supplemental Figure 1: FT-IR spectra of GSH and GSH-coated Ag<sub>2</sub>Te nanoparticles.

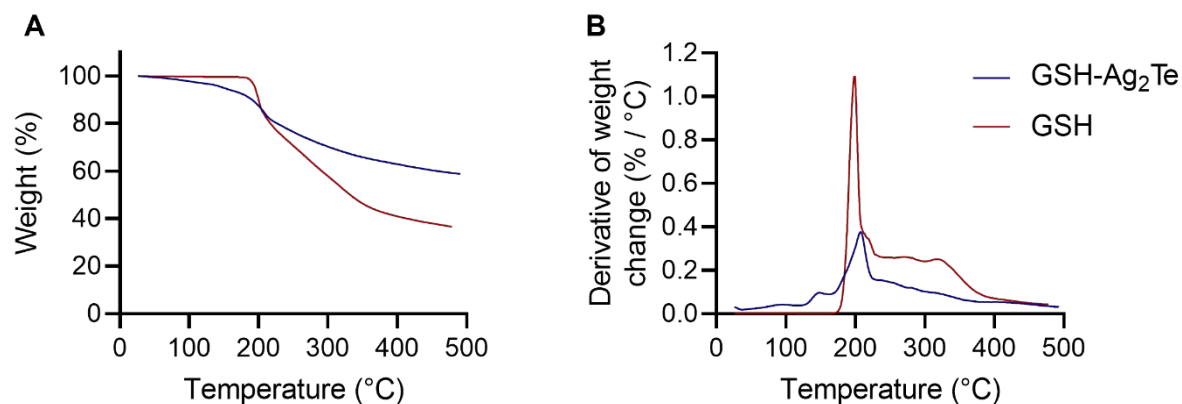

Supplemental Figure 2: Thermo-gravimetric analysis of GSH-Ag<sub>2</sub>Te (blue) and GSH (red). A) Weight (%) change and B) derivative of weight change (% / °C) of the two samples as the temperature was increased to 500 °C.

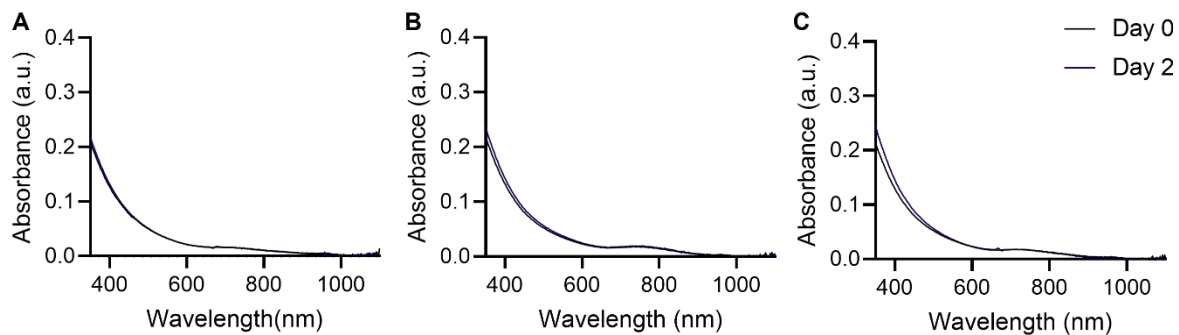

Supplemental Figure 3: GSH-Ag<sub>2</sub>Te nanoparticle stability over time. UV-vis of GSH-Ag<sub>2</sub>Te nanoparticles dispersed in A) water, B) PBS, and C) PBS + 10% FBS.

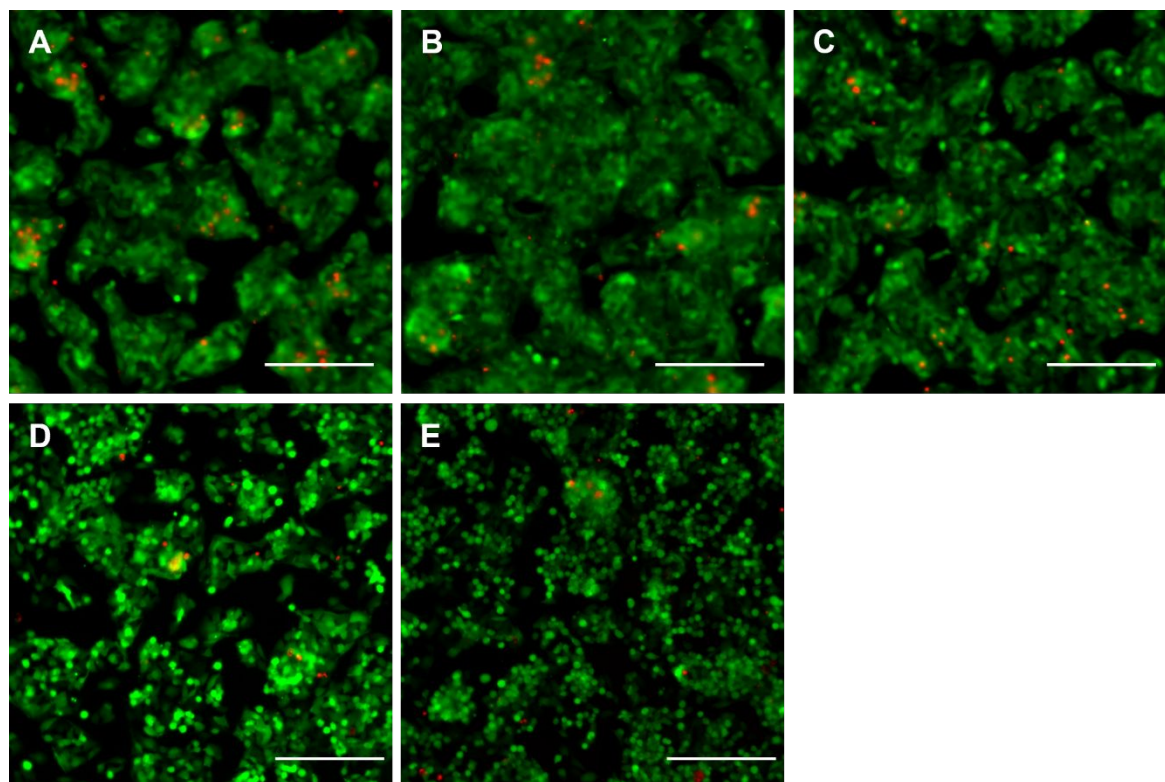

Supplemental Figure 4: Representative micrographs of HepG2 cells LIVE/DEAD assay at a GSH-Ag<sub>2</sub>Te nanoparticle concentration of A) 0, B) 0.1, C) 0.25, D) 0.5, and E) 1 mg of Ag per mL. Scale bar = 200  $\mu$ m; green = live cells; red = dead cells.

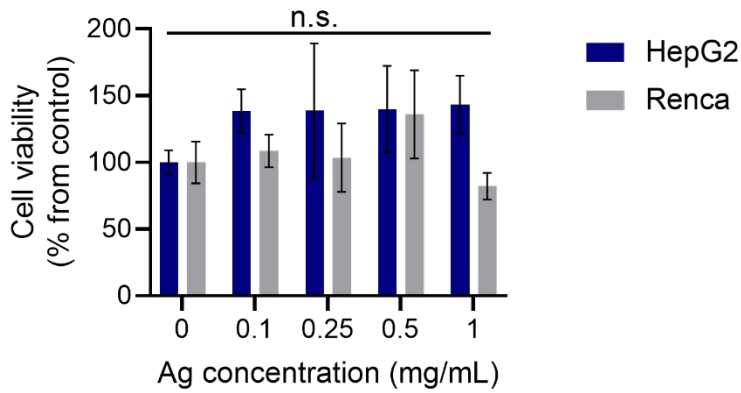

Supplemental Figure 5: MTS assay of HepG2 and Renca cells after 4 hours of incubation with GSH-Ag<sub>2</sub>Te nanoparticles at different concentrations. Data presented as mean ± SD.

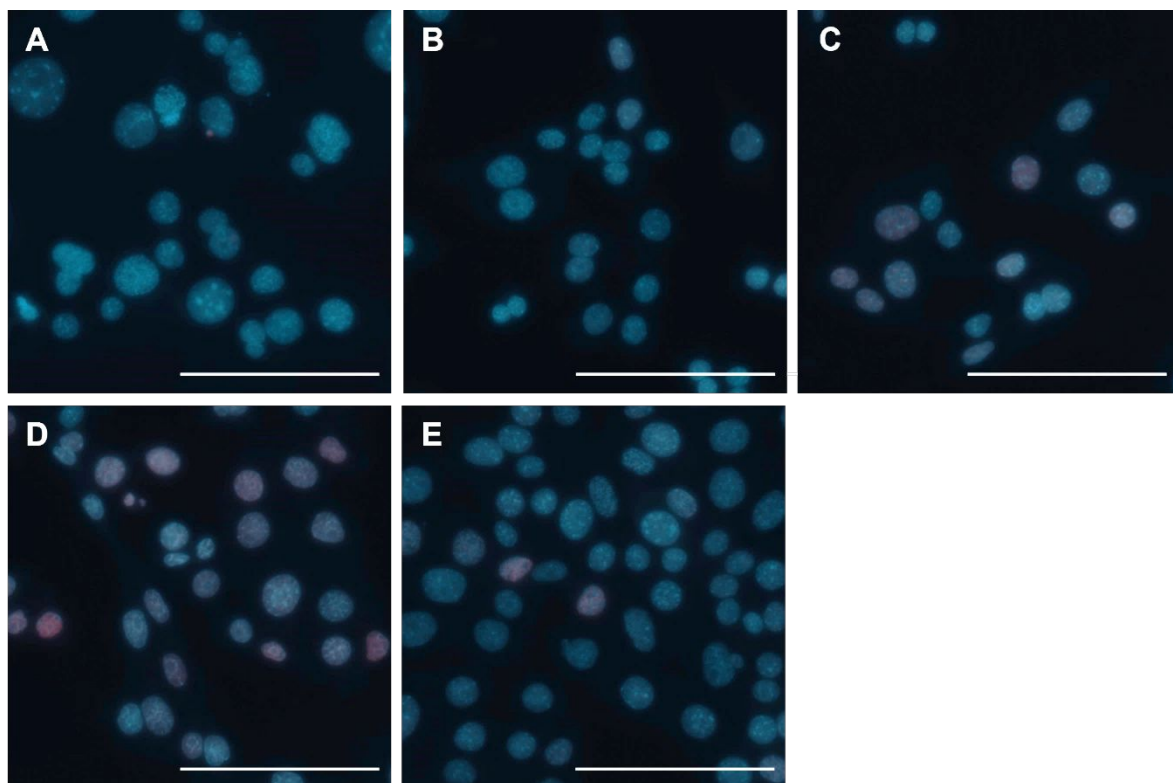

Supplemental Figure 6: Representative micrographs of  $\gamma$ H2AX immunostaining of Renca cells after 4 hours of incubation with A) 0, B) 0.25, C) 0.5 or D) 1 mg of Ag per mL of GSH-Ag<sub>2</sub>Te NPs. Renca cells were irradiated (6 Gy dose) as a positive control (E) for DNA damage. Scale bar = 100  $\mu$ m. Blue = nuclei and red =  $\gamma$ H2AX. Quantification was done in unedited images.

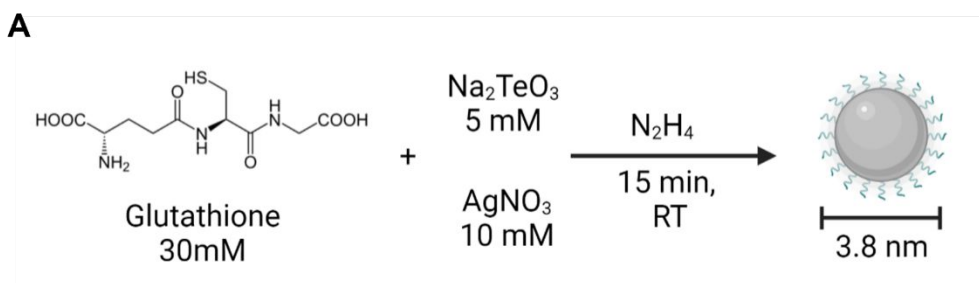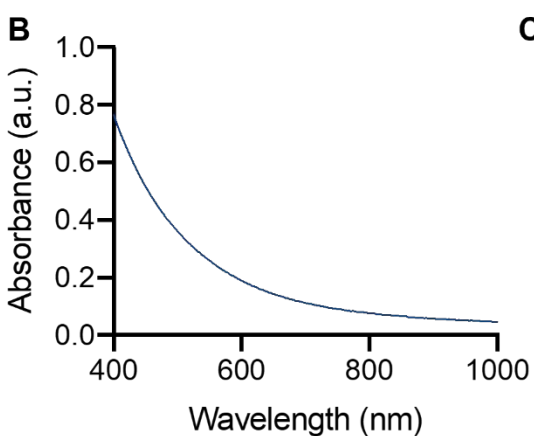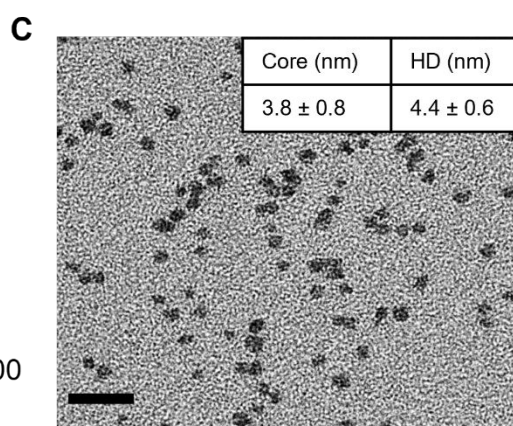

Supplemental Figure 7: Control GSH- $\text{Ag}_2\text{Te}$  nanoparticle synthesis schematic and characterization: A) Nanoparticle synthesis schematic. B) UV-vis spectrum of control GSH-coated  $\text{Ag}_2\text{Te}$  NPs. C) TEM micrograph of control GSH-coated  $\text{Ag}_2\text{Te}$  NPs. Inset shows the core size and hydrodynamic diameter (HD) data for control GSH-coated  $\text{Ag}_2\text{Te}$  NPs.

**A**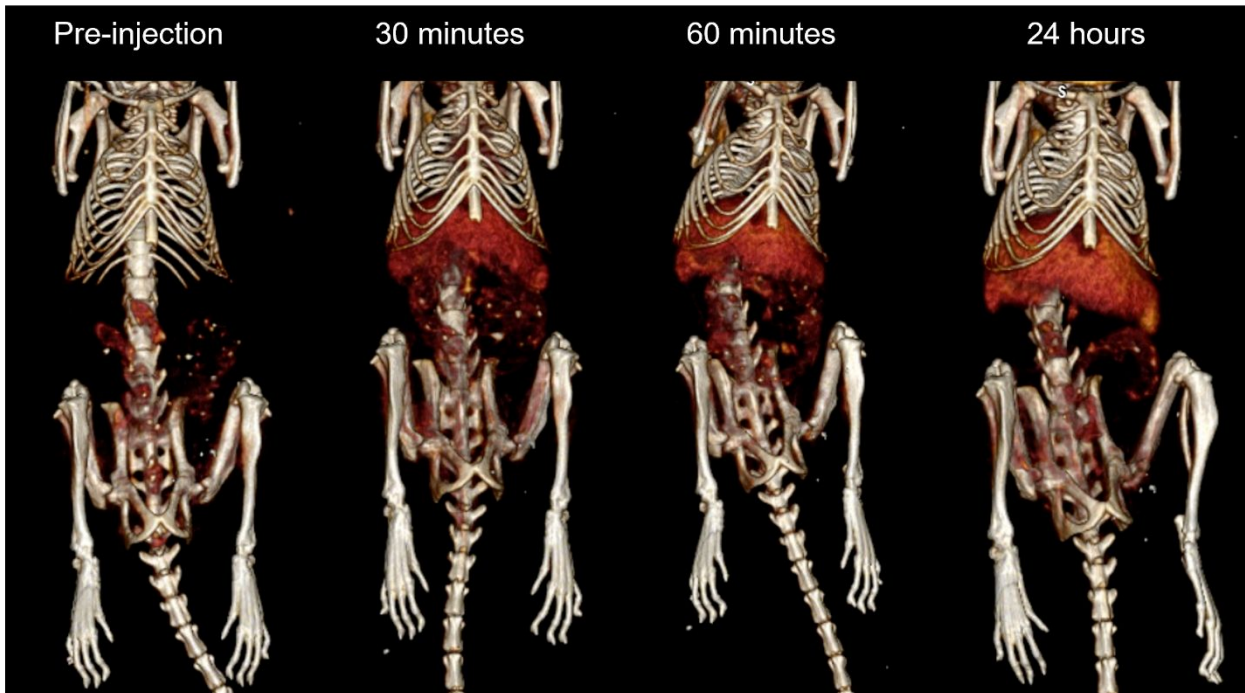**B**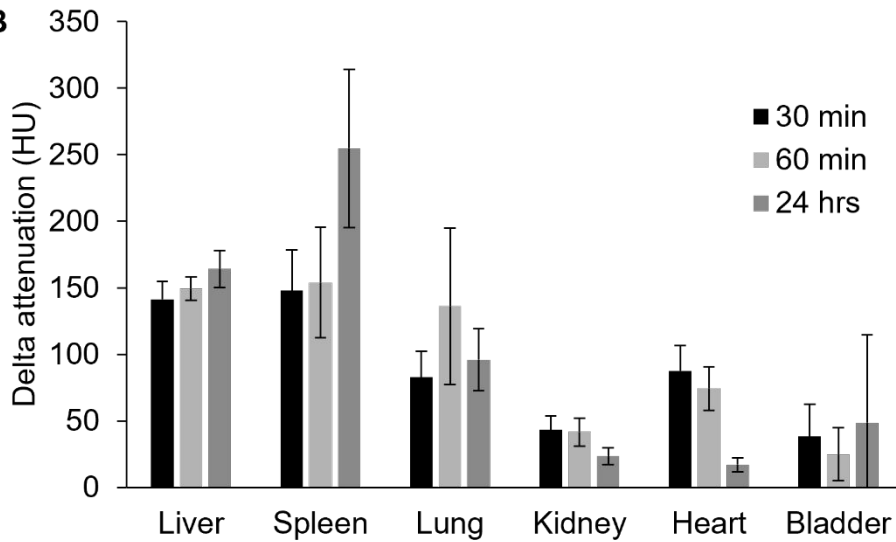

Supplemental Figure 8: A) Representative CT images of 4 nm GSH-coated  $\text{Ag}_2\text{Te}$  NPs injected mice pre-injection, 30 min, 60 min, and 24 hours post-injection. B) Quantification of the CT attenuation in the different organs of mice injected with 4 nm GSH- $\text{Ag}_2\text{Te}$  NPs at different time points (pre-injection, 30 min, 60 min, and 24 hours post-injection).  $n=5$  per group. Data is presented as mean  $\pm$  SEM.



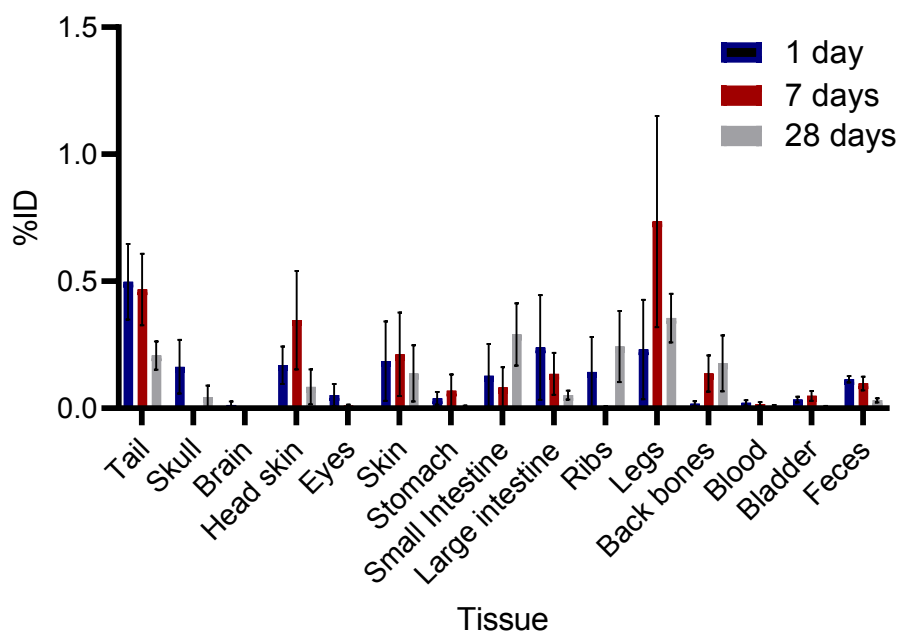

Supplemental Figure 9: Biodistribution of GSH-Ag<sub>2</sub>Te nanoparticles in other tissues at 1 day, 7 days, and 28 days post-injection. Data is presented as mean ± SEM.

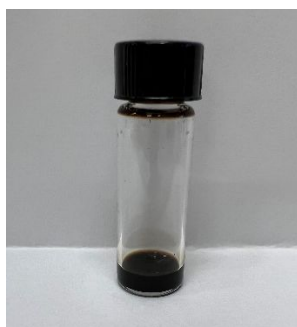

Supplemental Figure 10: Photograph of GSH-Ag<sub>2</sub>Te nanoparticle solution.
